# Supplementary material
Source: Research Square preprint supplement (doi:10.21203/rs.3.rs-9858212/v1)

Figure S1

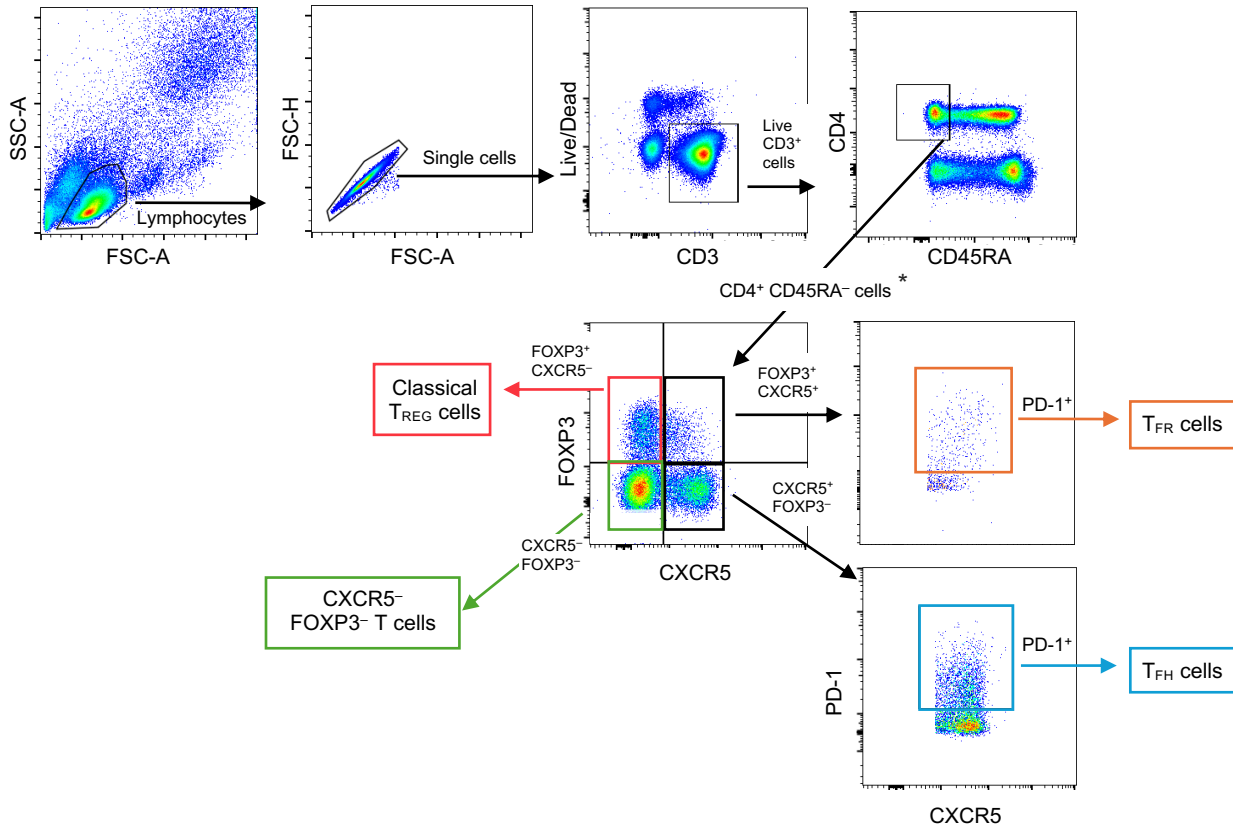

Figure S2

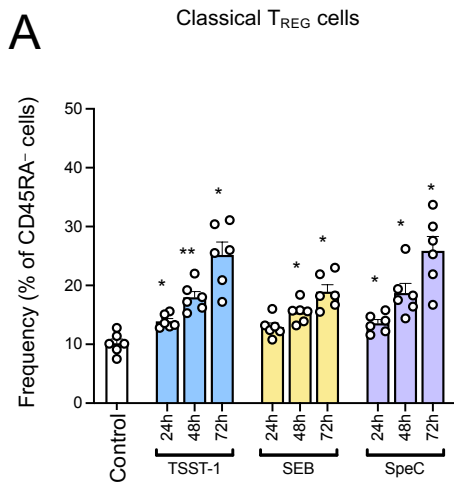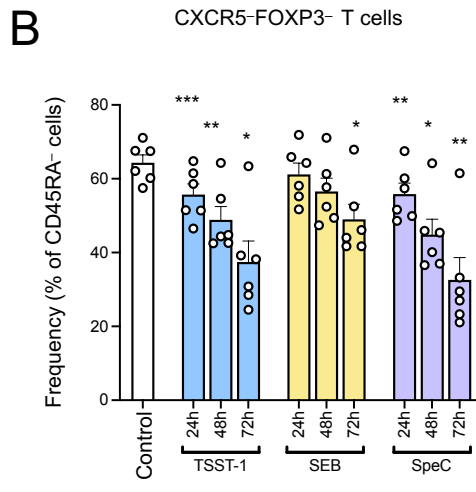

Figure S3

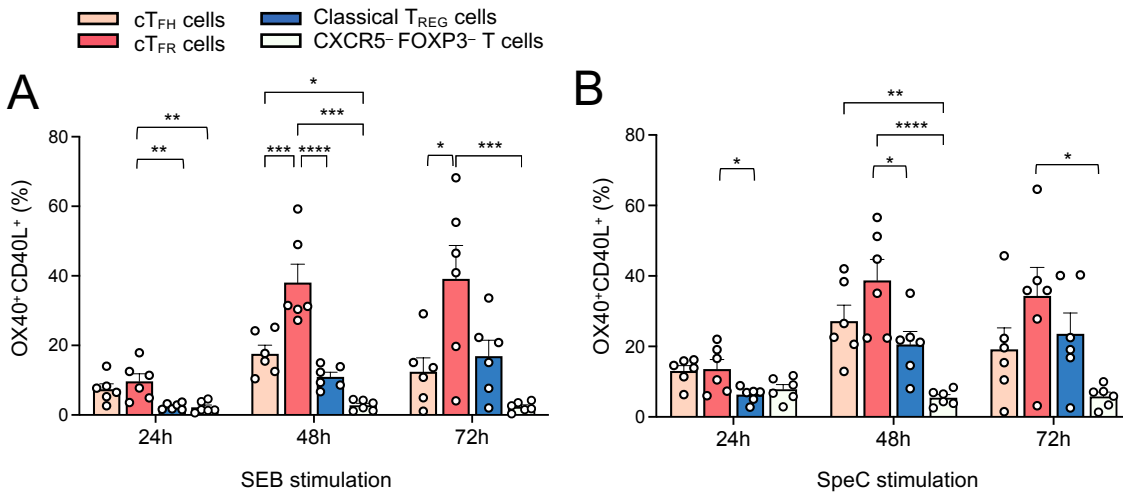

# Figure S4

cT<sub>FH</sub> cells    Classical T<sub>REG</sub> cells  
cT<sub>FR</sub> cells    CXCR5<sup>-</sup> FOXP3<sup>-</sup> T cells

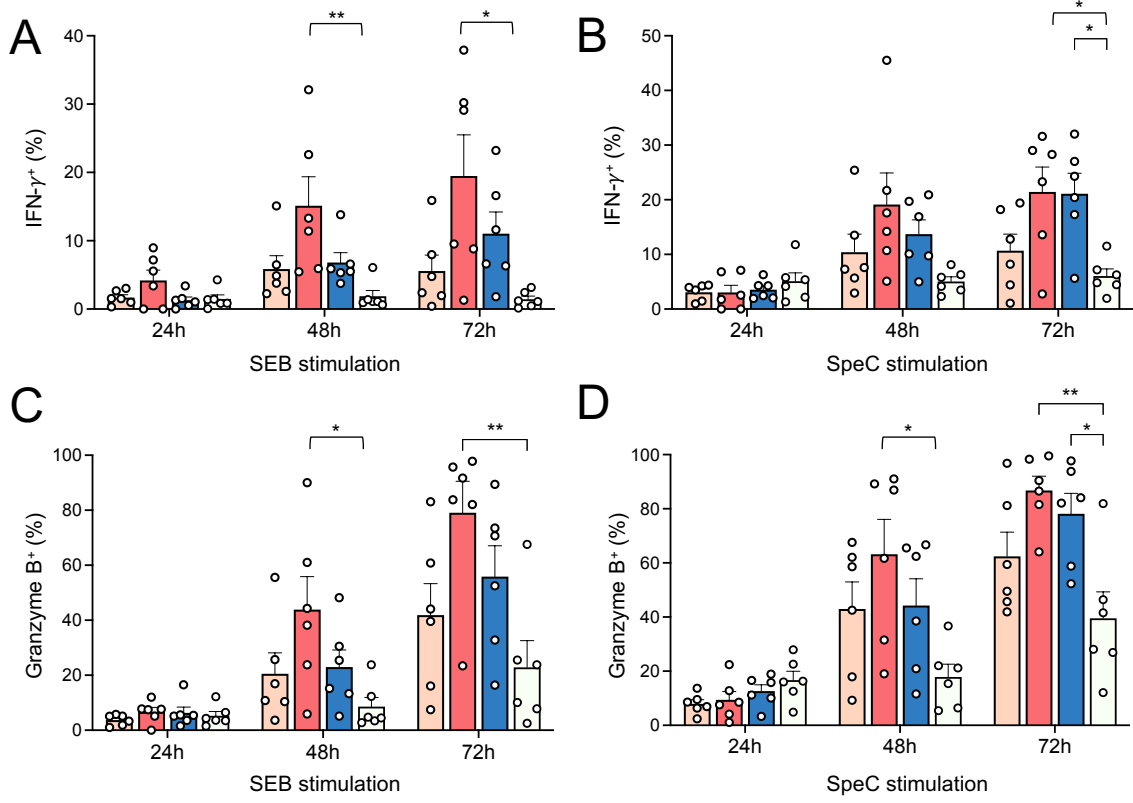

Figure S5

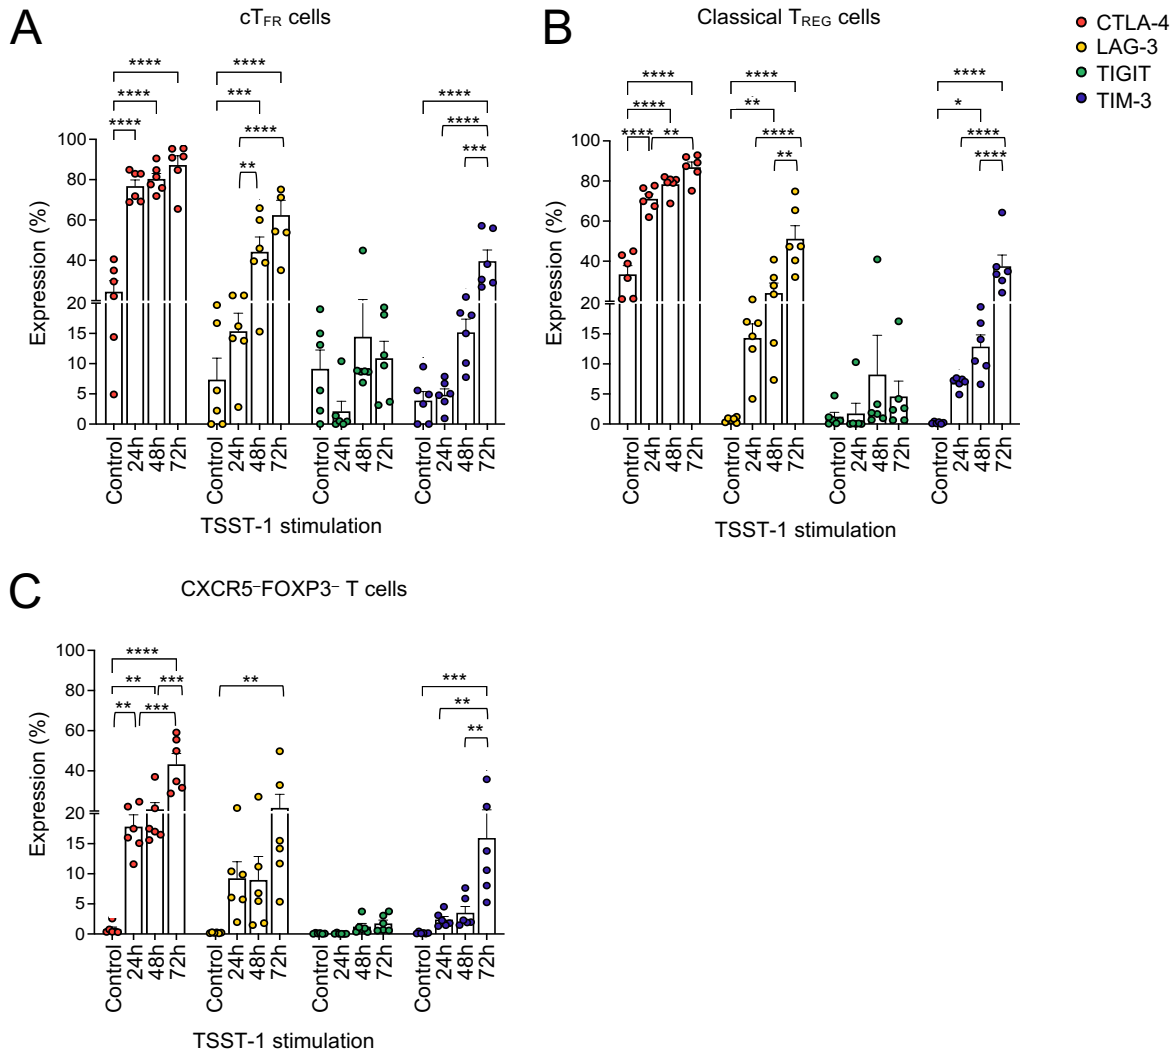

Figure S6

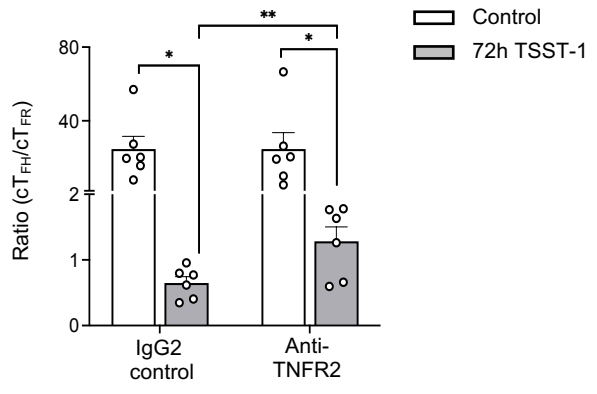

Figure S7

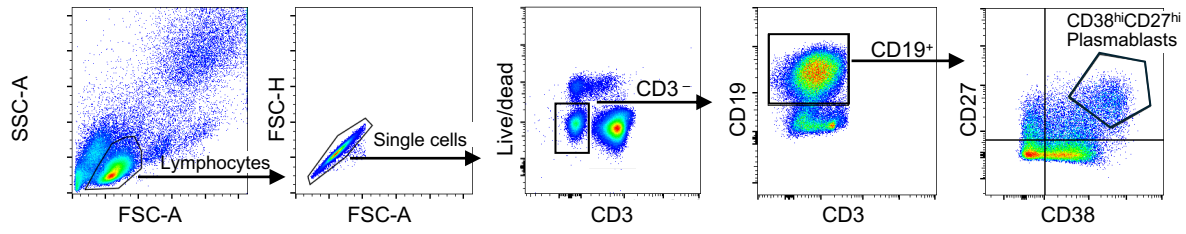

# Figure S8

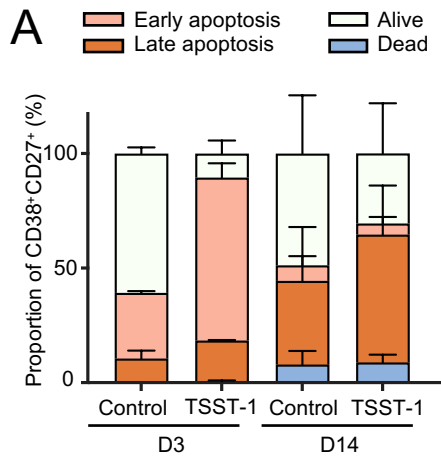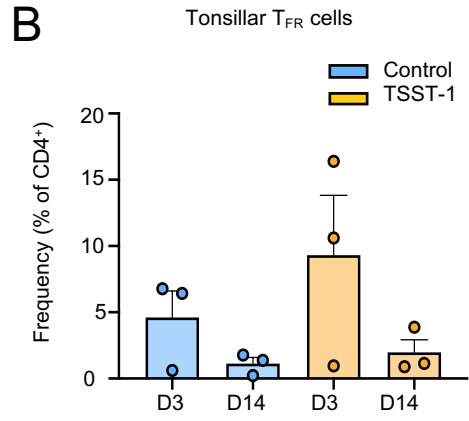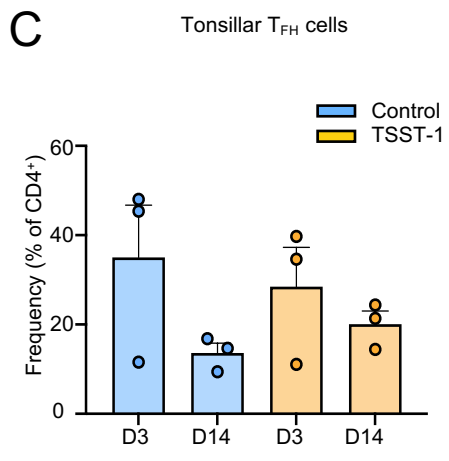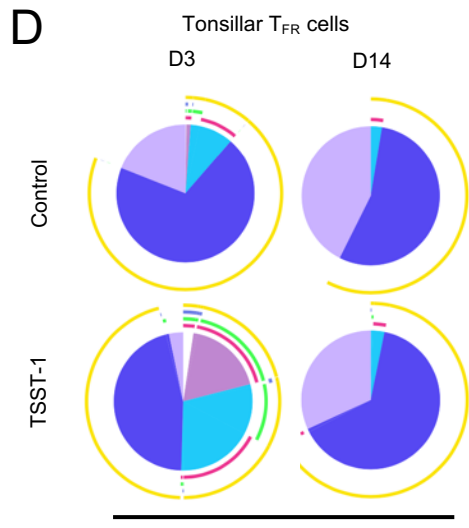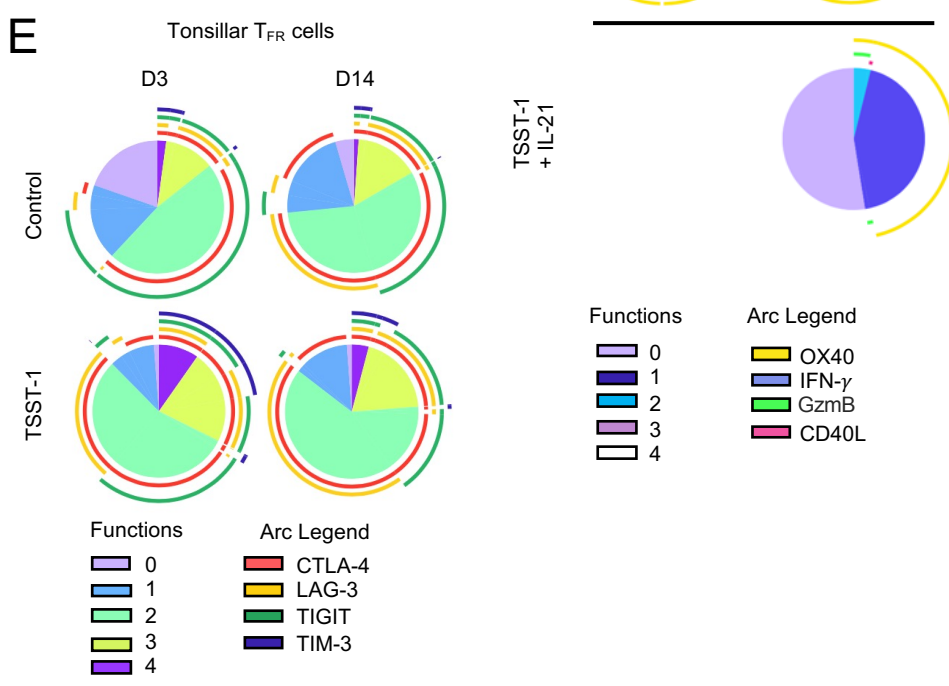

Supplement: Supplementary file 1 [file 0d7105241a1d98cca04581ec.pdf]
