# Supplementary material
Source: Research Square preprint supplement (doi:10.21203/rs.3.rs-9858212/v1)
Supplement: Supplementary file 2 [file 9abe92fd704d31c7d3209c00.docx]

**SUPPLEMENTARY FIGURE LEGENDS**

**Figure S1: Gating strategy for identifying CD4+ T cell subsets in human PBMCs, TMNCs and murine splenocytes**

Successive flow cytometric panels from one representative human donor showing the gating strategy to identify cTFH, cTFR, classical TREG and CXCR5–FOXP3– T cells in human PBMCs. For human TMNCs and murine splenocytes, CXCR5/FOXP3 populations were gated directly from CD4+ T cells rather than CD45RA– memory cells.

**Figure S2: Frequency of classical TREG and CXCR5–FOXP3– T cells in response to SAg stimulation**

Frequency of classical TREG (A) and CXCR5–FOXP3– T cells (B) as a proportion of CD4+CD45RA– T cells from human PBMCs from healthy controls cultured either in media alone (control) or stimulated with TSST-1, SEB or SpeC for 24h, 48h or 72h. Data are shown as mean ± SEM. Stimulated data are compared to unstimulated controls using a two-way ANOVA with Dunnett’s multiple comparisons test where asterisks indicate statistically significant differences compared to controls. *p<0.05, **p<0.01, ***p<0.001, ****p<0.0001.

**Figure S3: OX40 and CD40L expression on circulating memory CD4+ T cells in response to SEB and SpeC stimulation**

Frequency of OX40+CD40L+ cTFH, cTFR, classical TREG and CXCR5–FOXP3– T cells from human PBMCs collected from healthy donors in response to 24h, 48h or 72h SEB (A) or SpeC (B) stimulation. Unstimulated data were subtracted from each stimulated condition. Each dot represents one donor. Data are shown as mean ± SEM. For each length of stimulation, cellular subsets are compared using a one-way ANOVA with Tukey’s multiple comparisons test: *p<0.05, **p<0.01, ***p<0.001, ****p<0.0001.

**Figure S4: IFN-γ and granzyme B production by circulating memory CD4+ T cells in response to SEB and SpeC stimulation**

Frequency of IFN-γ+ cTFH, cTFR, classical TREG and CXCR5–FOXP3– T cells from human PBMCs collected from healthy donors in response to 24h, 48h or 72h SEB (A) or SpeC (B) stimulation. Unstimulated data was subtracted from each stimulated condition. Frequency of granzyme B+ cTFH, cTFR, classical TREG and CXCR5–FOXP3– T cells from human PBMCs in response to 24h, 48h or 72h SEB (C) or SpeC (D) stimulation. Unstimulated data were subtracted from each stimulated condition. Each dot represents one donor. Data are shown as mean ± SEM. For each length of stimulation, cellular subsets are compared using a one-way ANOVA with Tukey’s multiple comparisons test: *p<0.05, **p<0.01, ***p<0.001, ****p<0.0001.

**Figure S5: Co-IR expression on cTFR and cTREG cells compared to CXCR5–FOXP3– T cells in response to TSST-1 stimulation**

Frequency of CTLA-4+ (red dots), LAG-3+ (yellow dots), TIGIT+ (green dots) and TIM-3+ (blue dots) cTFR (A) classical TREG (B) and CXCR5–FOXP3– T cells (C) from human PBMCs collected from healthy donors either cultured in media alone (control) or stimulated with TSST-1 for 24h, 48h or 72h. Each dot represents one donor. Data are shown as mean ± SEM. For each marker, cellular subsets are compared using a one-way ANOVA with Tukey’s multiple comparisons test: *p<0.05, **p<0.01, ***p<0.001, ****p<0.0001.

**Figure S6: TNFR2 blockade reduces TSST-1-induced decline in the ratio of cTFH:TFR cells**

Ratio of cTFH:cTFR cells from human PBMCs collected from healthy donors either cultured with media alone (control, white bars) or stimulated with TSST-1 for 72h (grey bars) in the presence of an IgG2 isotype control or a TNFR2 blocking antibody. Each dot represents one donor. Data are shown as mean ± SEM. Data are compared using a two-way ANOVA with uncorrected Fisher’s LSD: *p<0.05, **p<0.01, ***p<0.001, ****p<0.0001.

**Figure S7: Gating strategy for identifying CD38hiCD27hi plasmablasts in human tonsil organoids**

Successive flow cytometric panels from one representative human donor showing the gating strategy to identify CD38hiCD27hi plasmablasts in human tonsil organoids.

**Figure S8: TSST-1 induced alterations in CXCR5+ CD4+ T cells and plasmablasts in human tonsil organoids**

Proportion of CD38+CD27+ B cells from human tonsil organoids either cultured in media with BAFF alone (control) or cultured in media with BAFF alone and stimulated with TSST-1 for 3 or 14 days that are alive (Viability dye– Annexin V–), in early apoptosis (Viability dye–Annexin V+), in late apoptosis (Viability dye+Annexin V+) or dead (Viability dye+Annexin V–) (A). Data are shown as stacked bar charts and represent mean ± SEM. Frequency of TFR (B) and TFH (C) cells as a proportion of CD4+ T cells from human tonsil organoids either cultured in media with BAFF alone (control) or cultured in media with BAFF and stimulated with TSST-1 for 3 or 14 days. Each dot represents one donor. Data are shown as mean ± SEM. Data are compared using a one-way ANOVA with Tukey’s multiple comparisons test: *p<0.05, **p<0.01, ***p<0.001, ****p<0.0001. Polyfunctionality profiles of TFR cells from human tonsil organoids either cultured in media with BAFF alone (control) or cultured in media with BAFF and stimulated with TSST-1 for 3 or 14 days, or TSST-1 + IL-21 for 14 days (D). Pie chart segments from concatenated data (n=3 donors) represent the proportion of cells expressing the indicated number of surface or intracellular markers (functions). Arcs describe the individual markers found on expressing cells including OX40, IFN-γ, GzmB and CD40L (arc legend). Co-IR profiles of tonsillar TFR from human tonsil organoids either cultured in media with BAFF alone (control) or cultured in media with BAFF and stimulated with TSST-1 for 3 or 14 days (E). Pie chart segments from concatenated data (n=3) represent the proportion of cells expressing the indicated number of surface or intracellular markers (functions). Arcs describe the individual markers found on expressing cells including CTLA-4, LAG-3, TIGIT and TIM-3 (arc legend).
